# Supplementary material for: Adaptive genomic evolution of opsins reveals that early mammals flourished in nocturnal environments
Source: PubMed Central journal article supplement (PMC5800076; doi:10.1186/s12864-017-4417-8), 2018-02-05

# Adaptive genomic evolution of opsins reveals that early mammals flourished in nocturnal environments

Rui Borges, Warren E. Johnson, Stephen J. O'Brien, Cidália Gomes, Christopher P. Heesy and Agostinho Antunes

Figure S2

Phylogenetic character mapping for the ancestral reconstructions

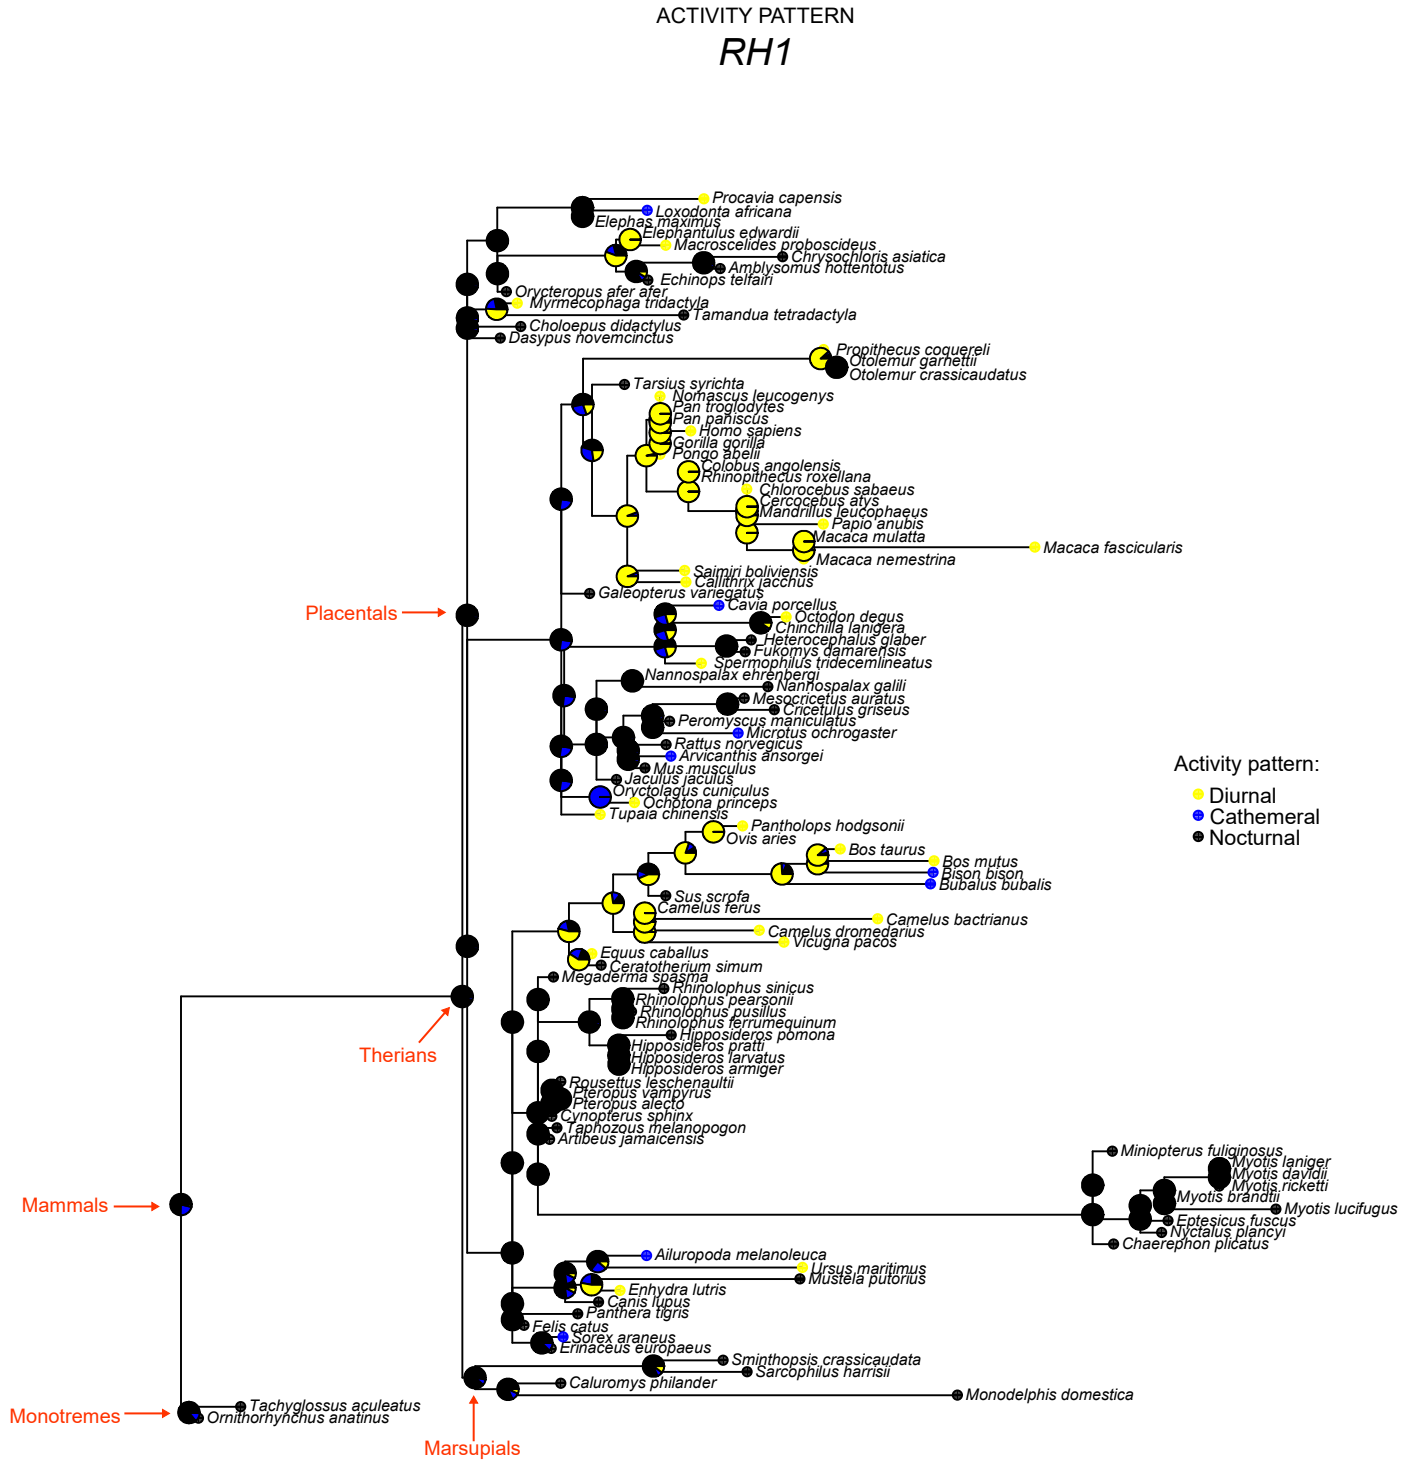



VISUAL ACUITY  
RH1

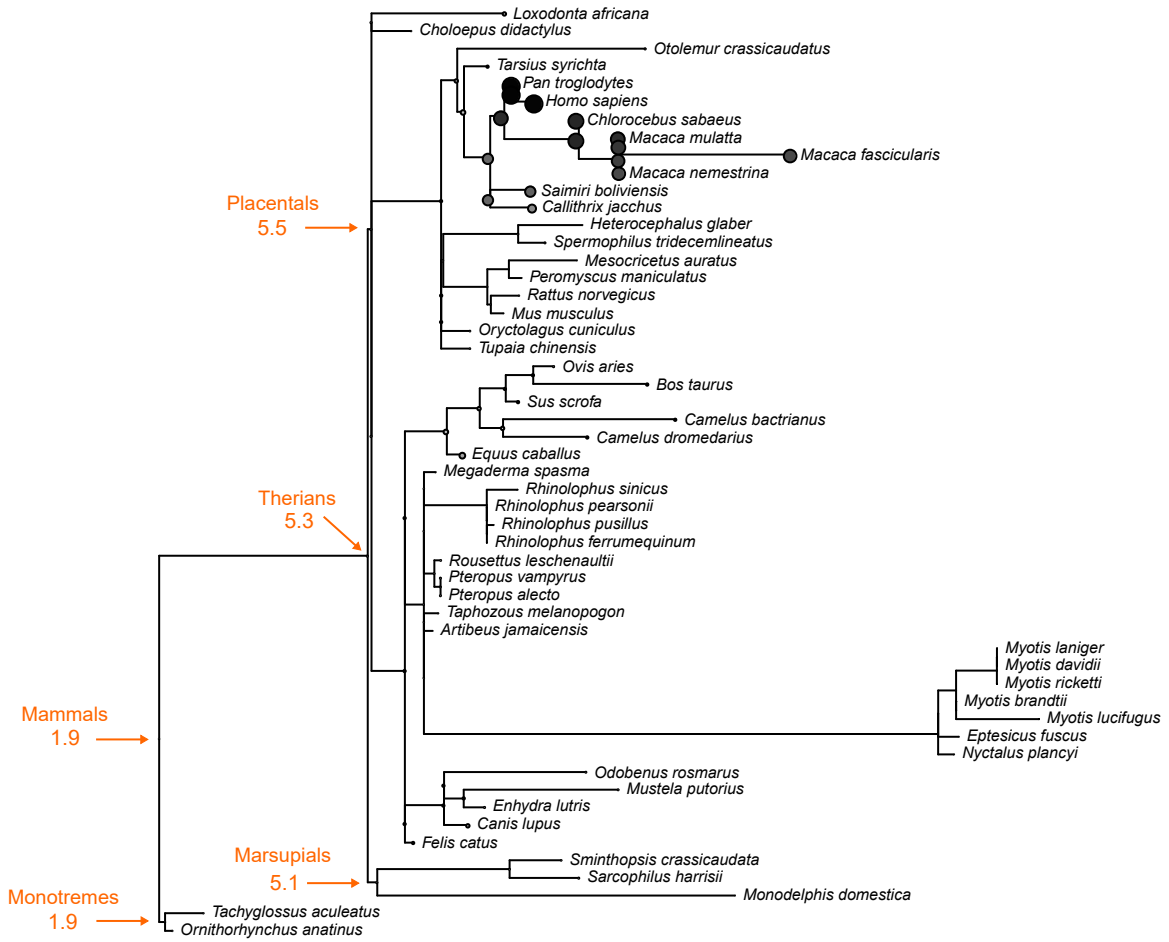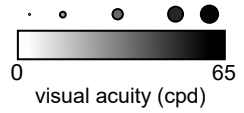

VISUAL ACUITY  
*OPN1sw1*

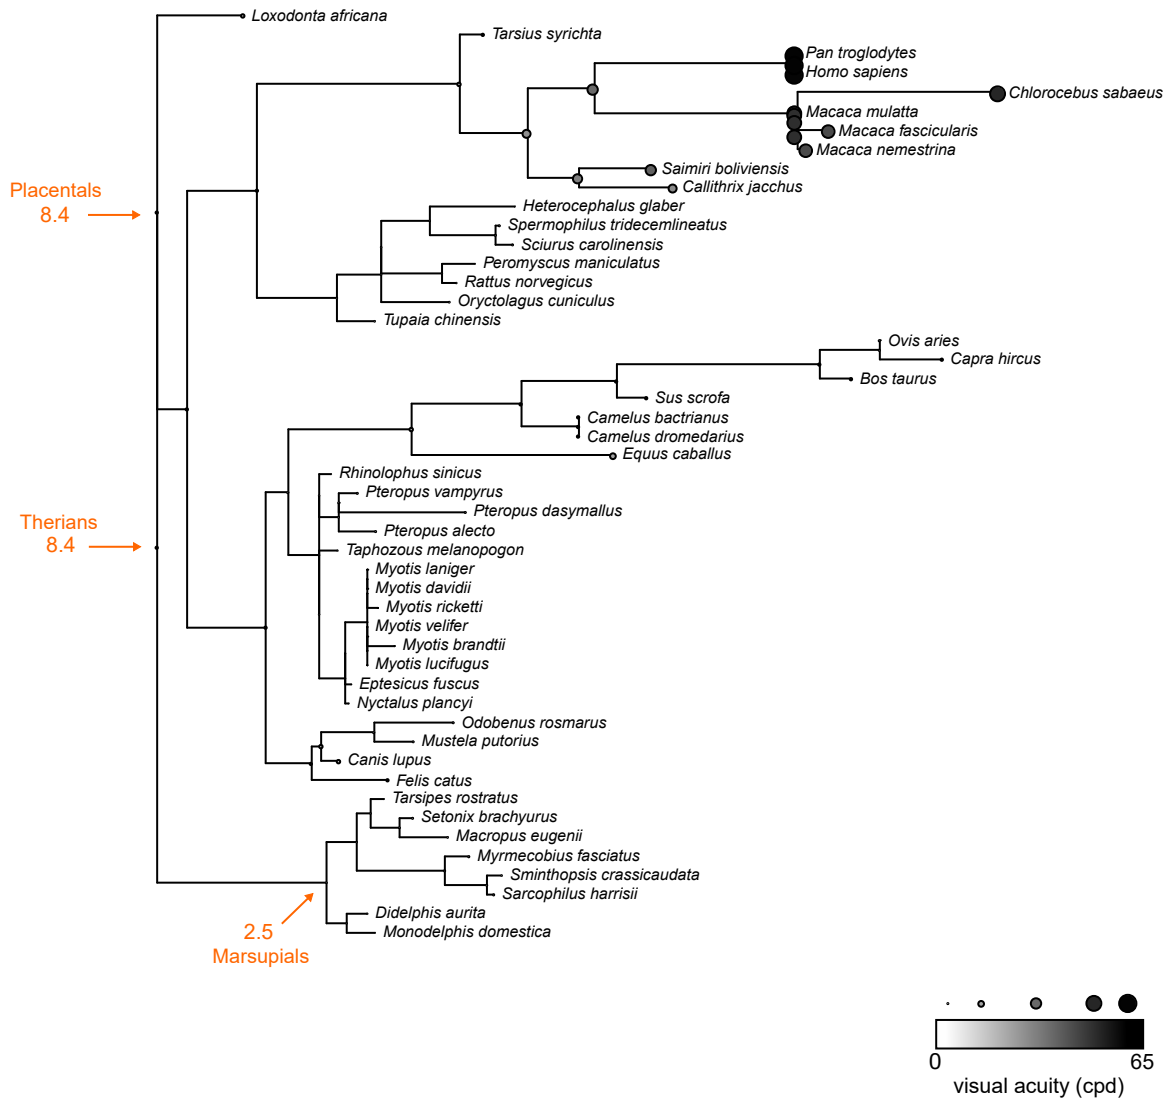



VISUAL ACUITY  
OPN3

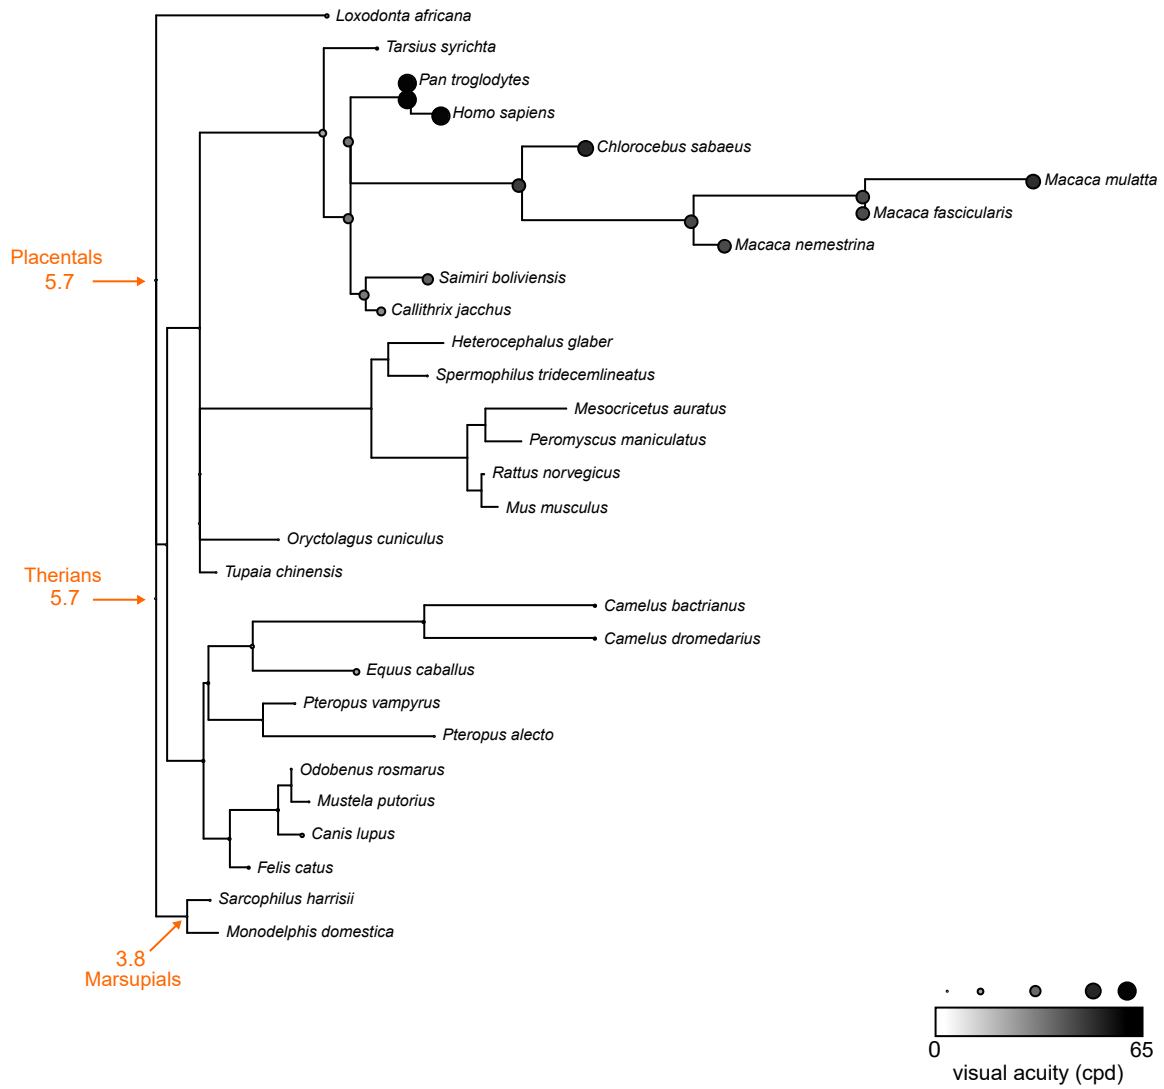

VISUAL ACUITY  
OPN5

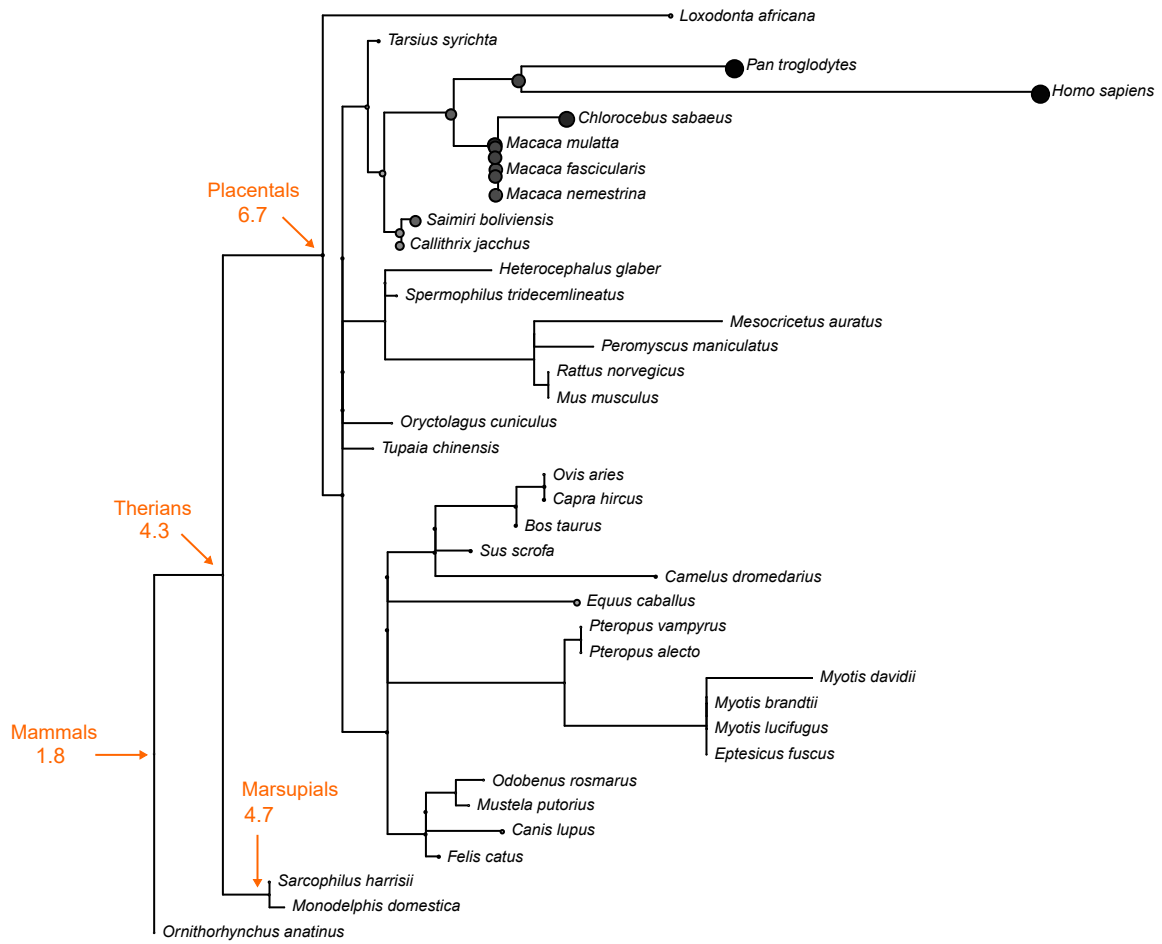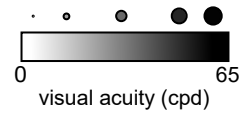

VISUAL ACUITY  
RGR

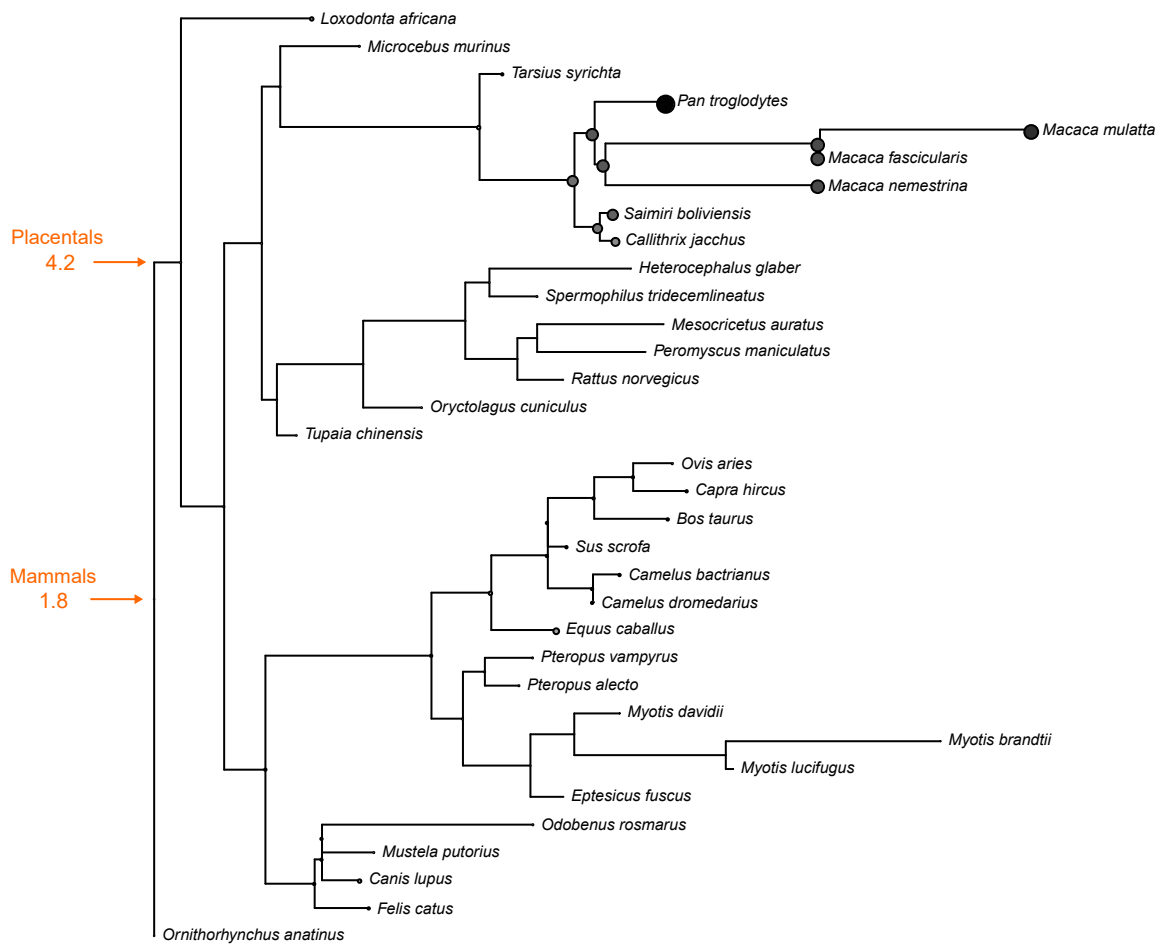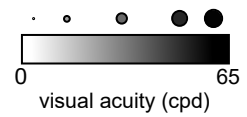



VISUAL ACUITY  
RRH

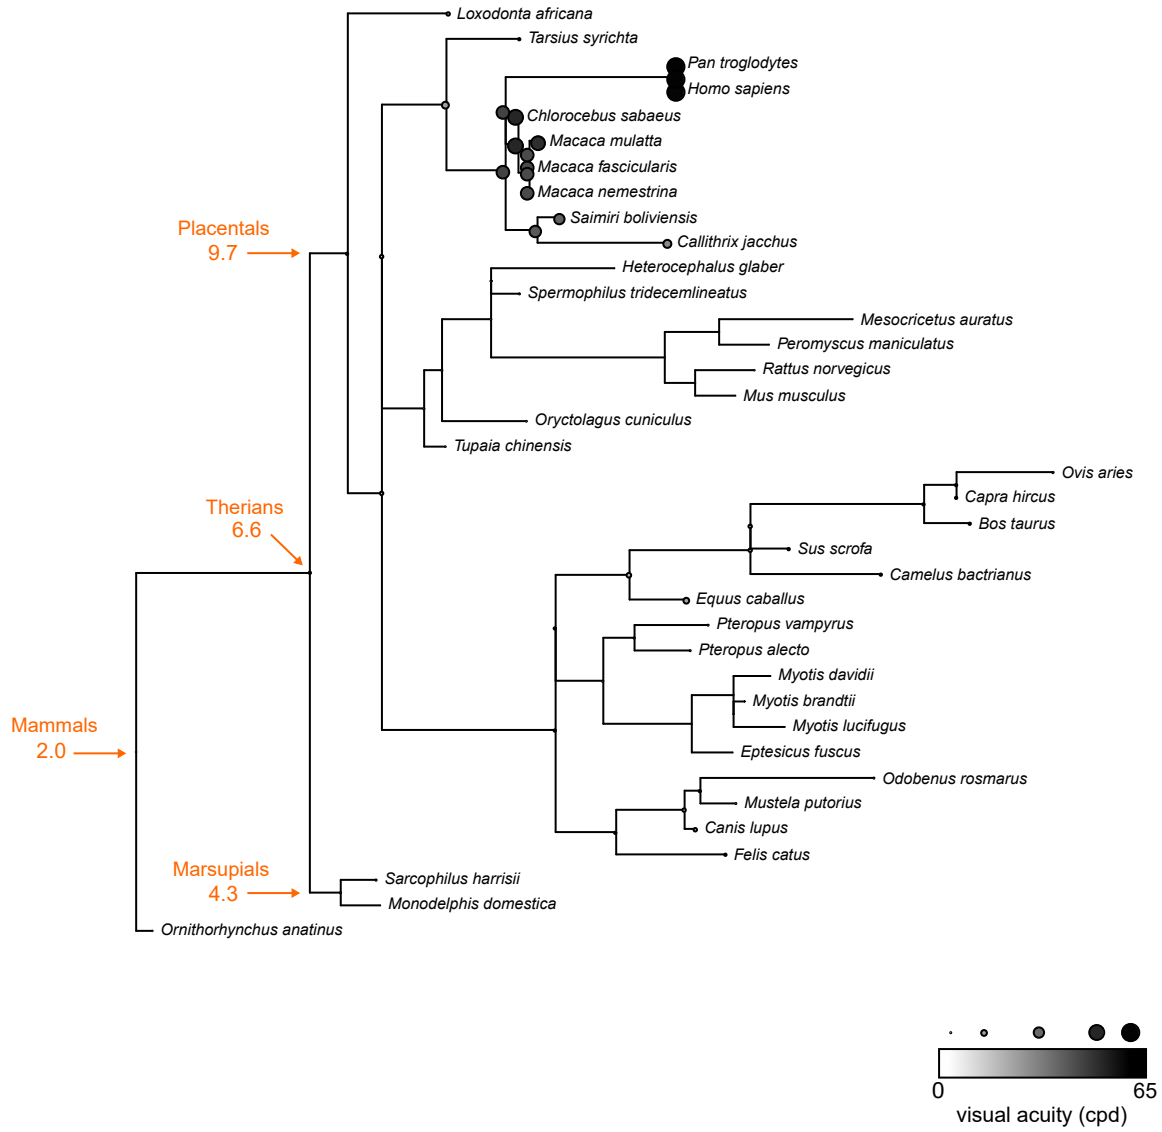

VISUAL ACUITY  
OPN4m

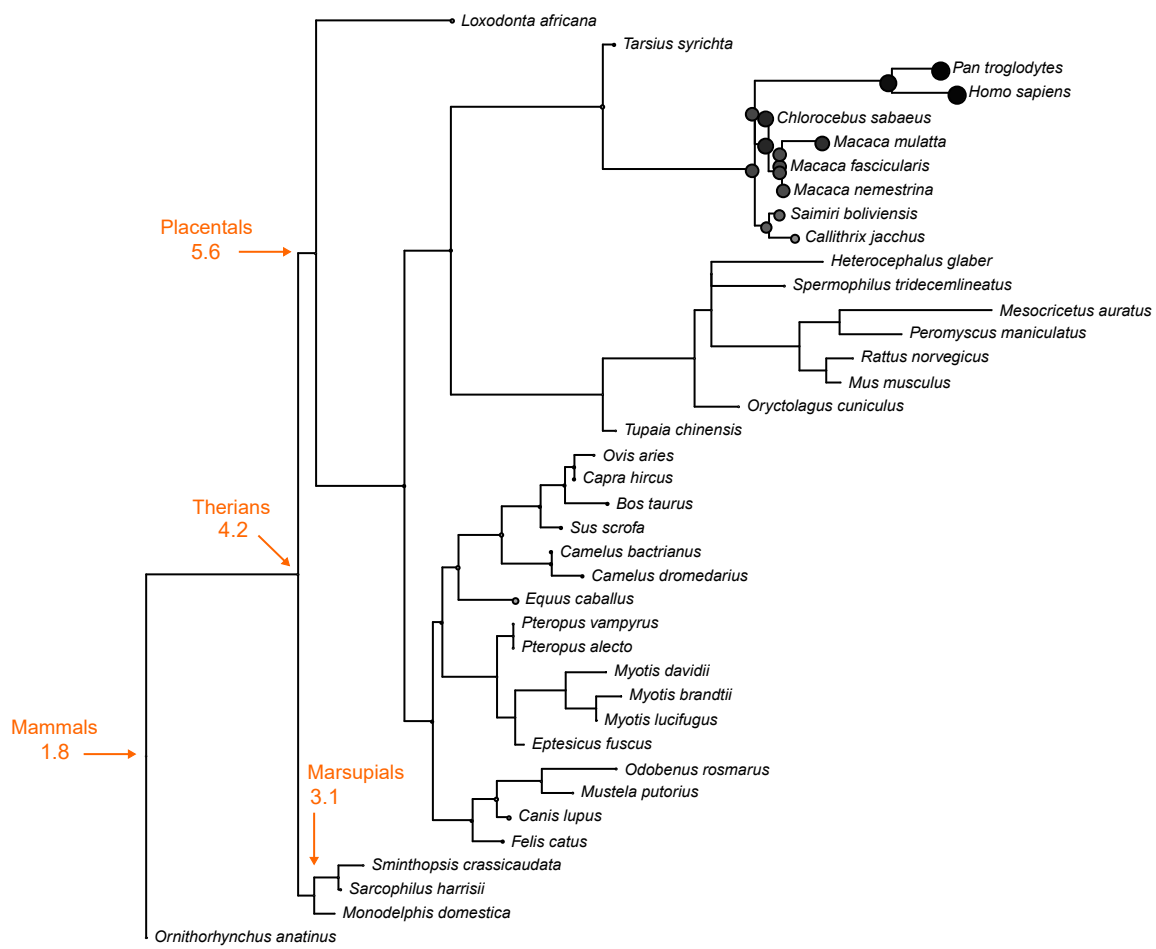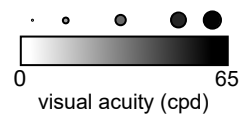

# ORBIT CONVERGENCE RH1

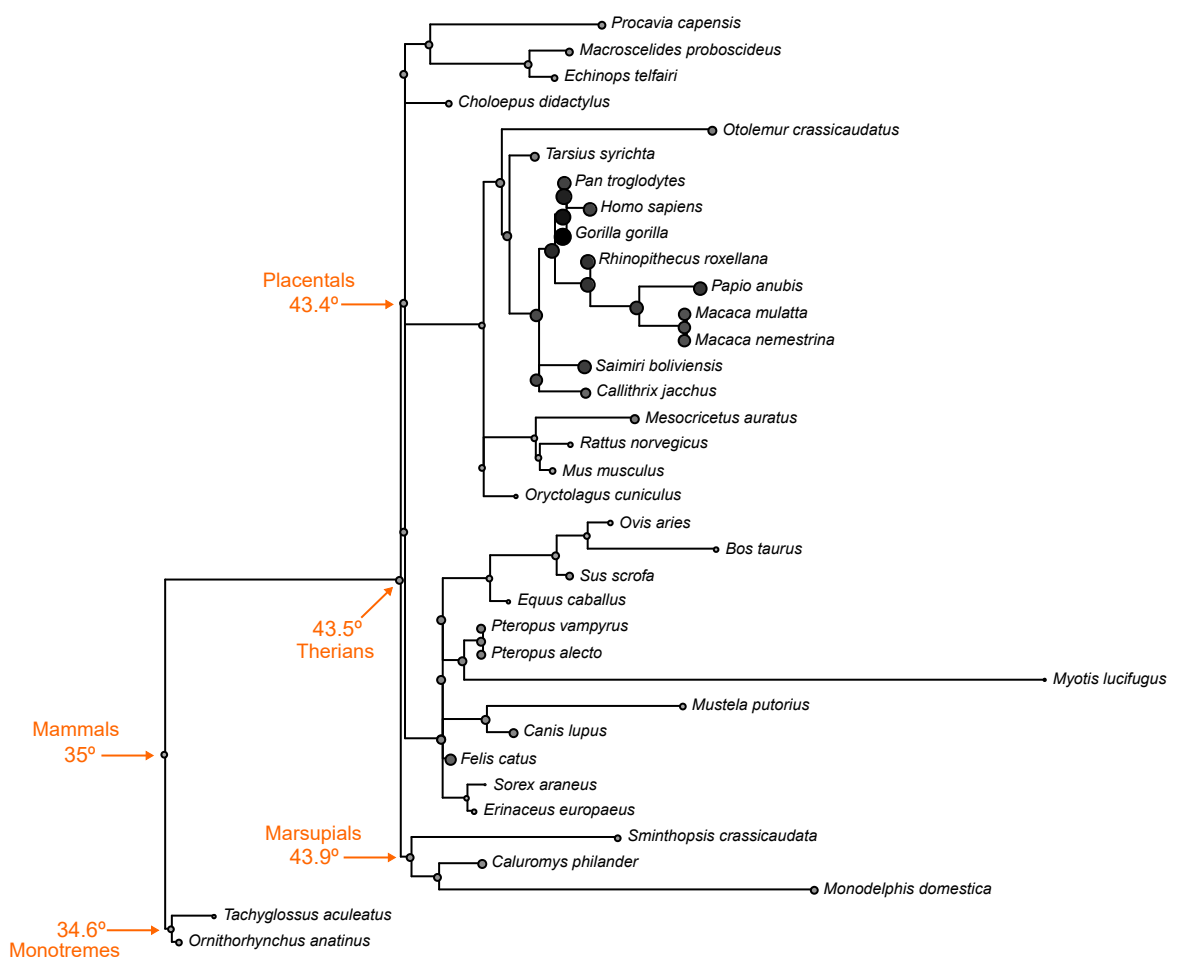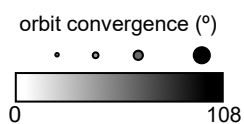

ORBIT CONVERGENCE

OPN1sw1

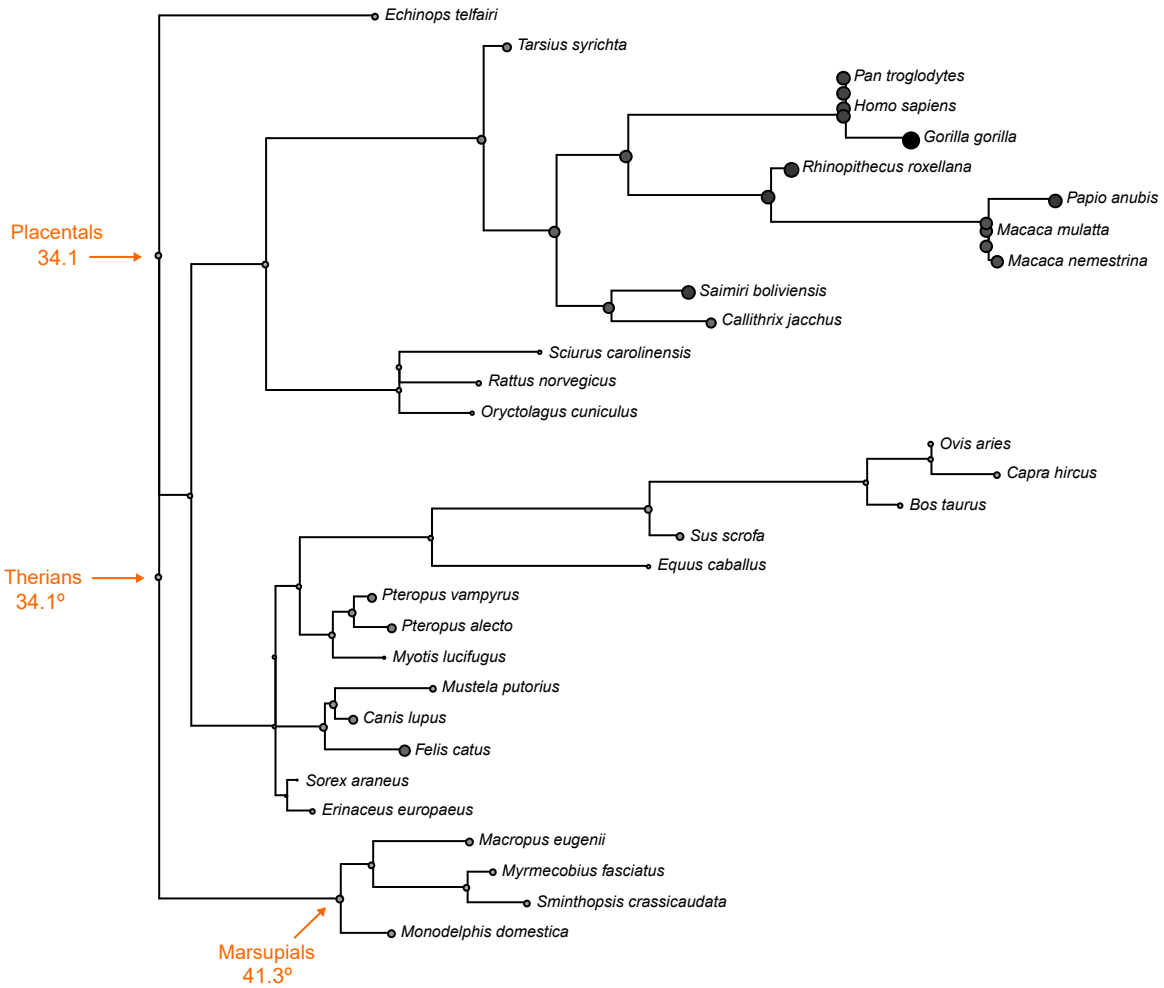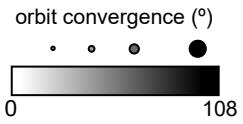

ORBIT CONVERGENCE

*OPN1lw*

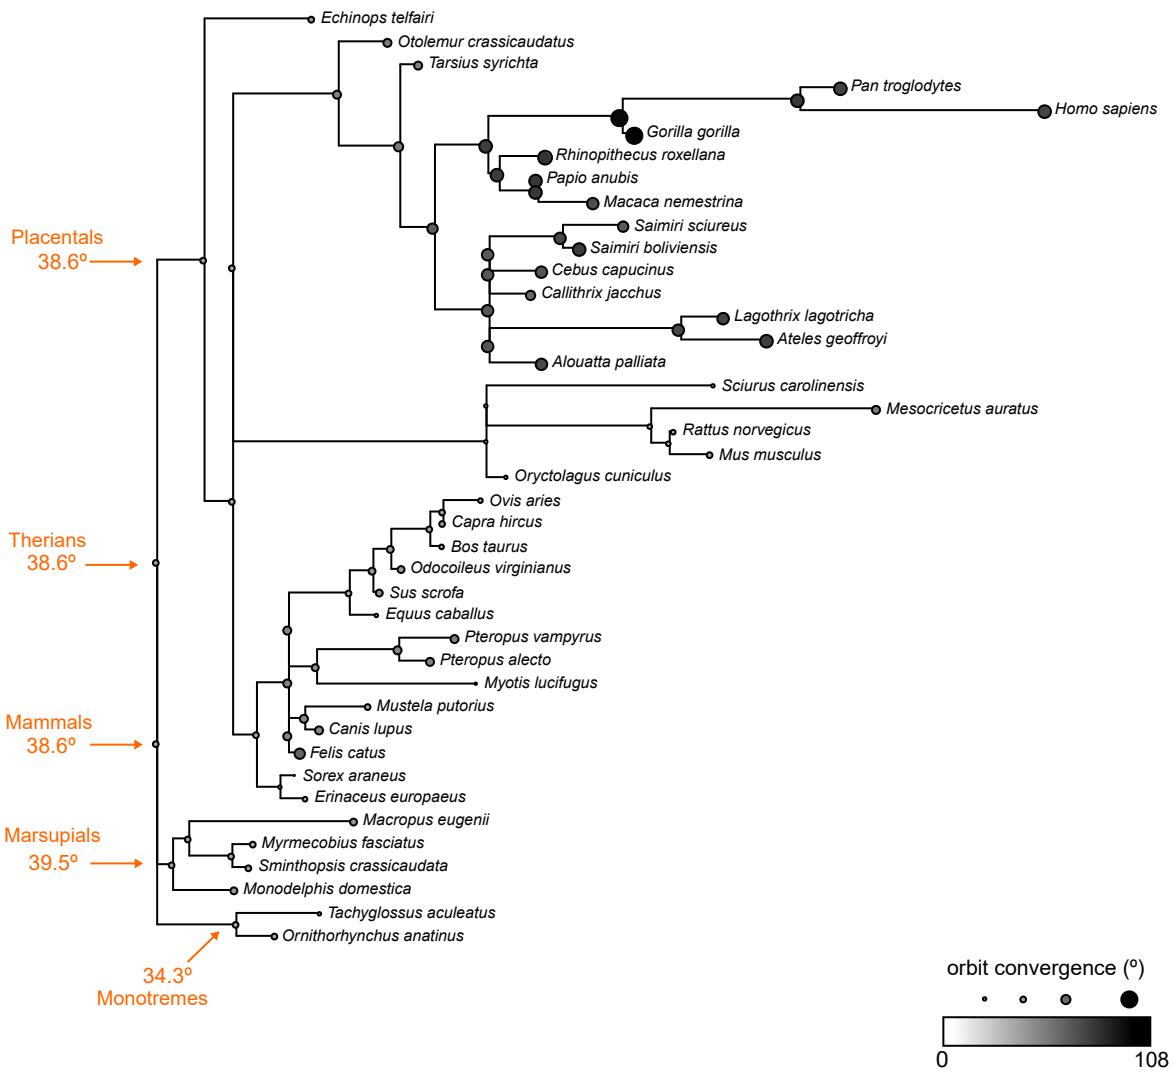

ORBIT CONVERGENCE  
*OPN3*

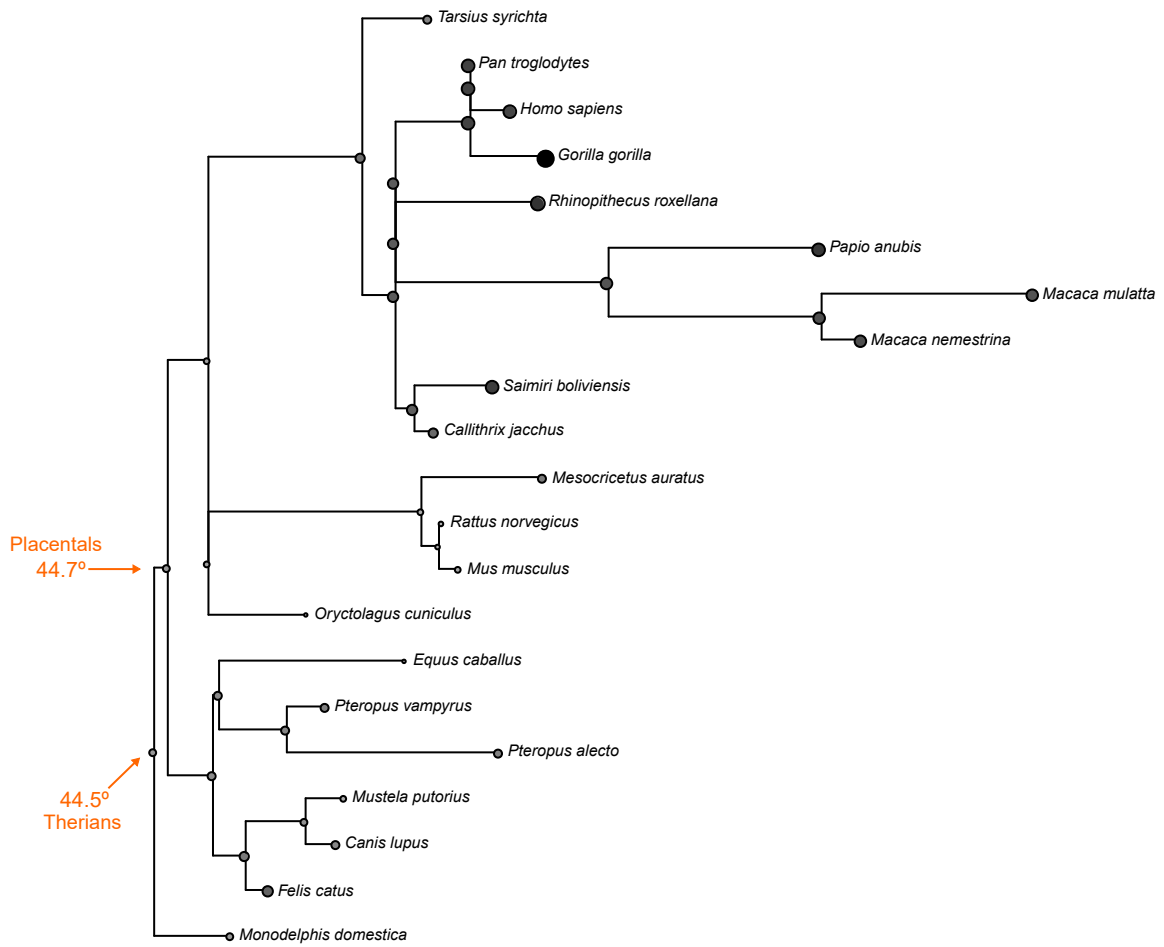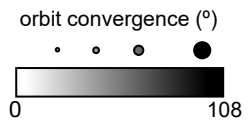

ORBIT CONVERGENCE  
OPN5

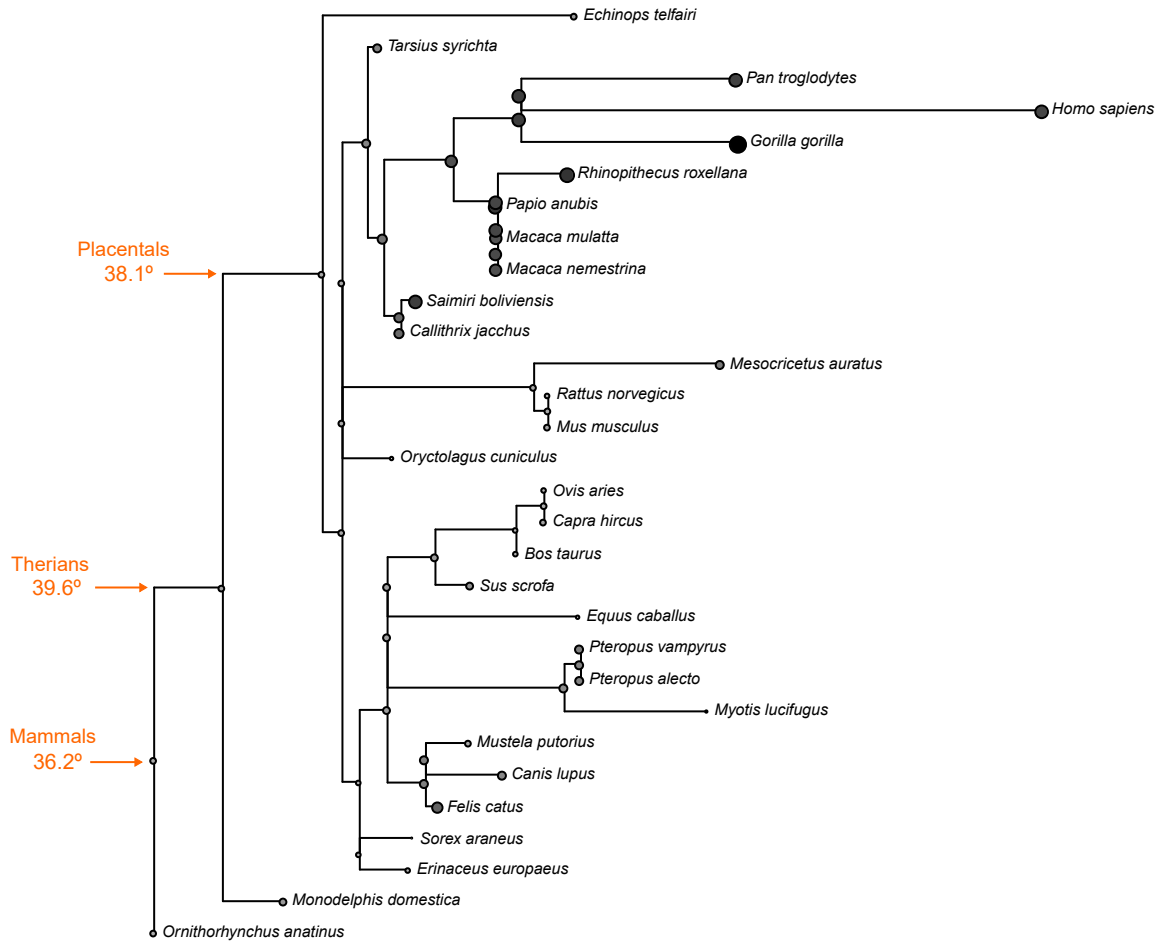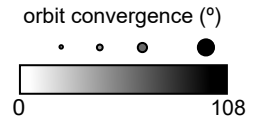

ORBIT CONVERGENCE  
RGR

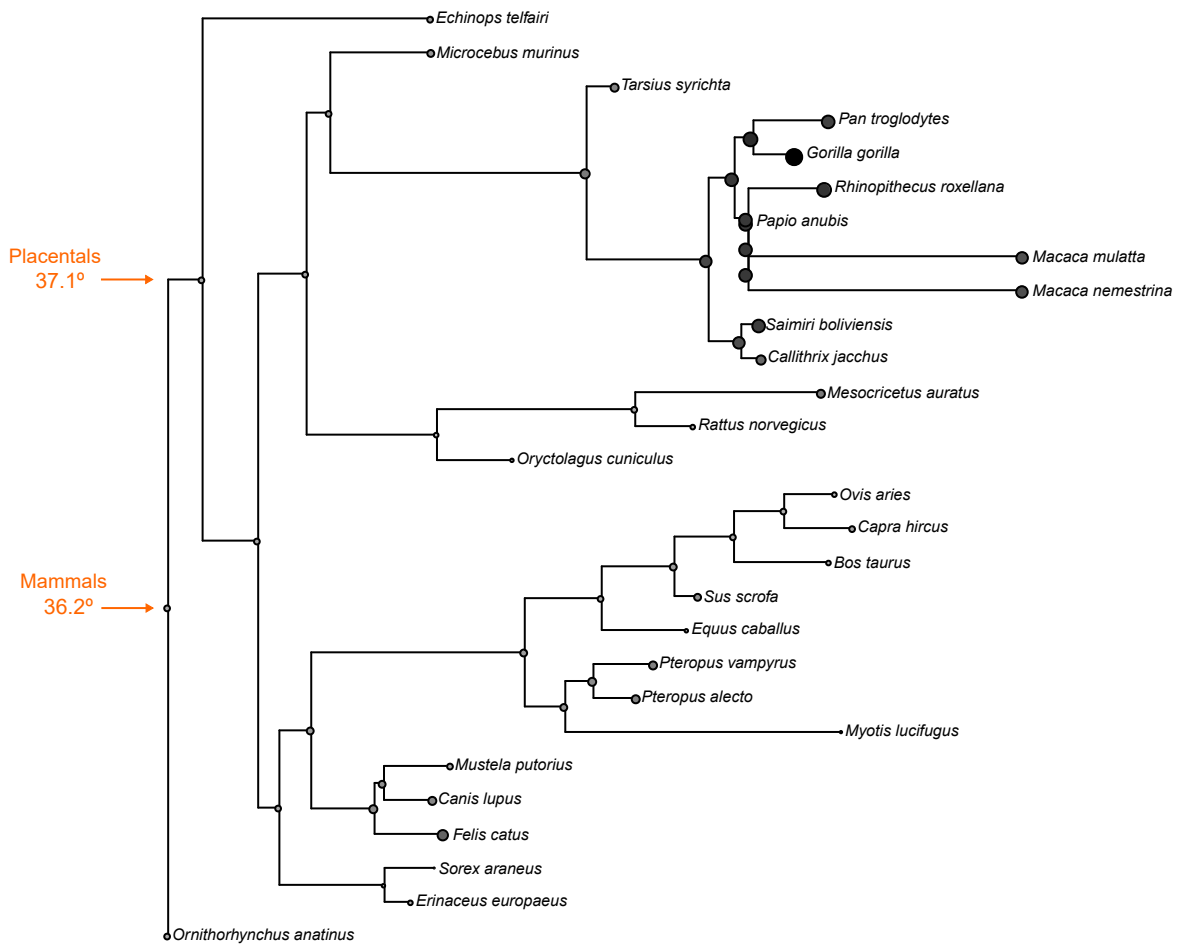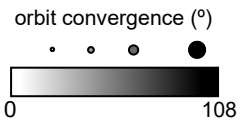



ORBIT CONVERGENCE  
*RRH*

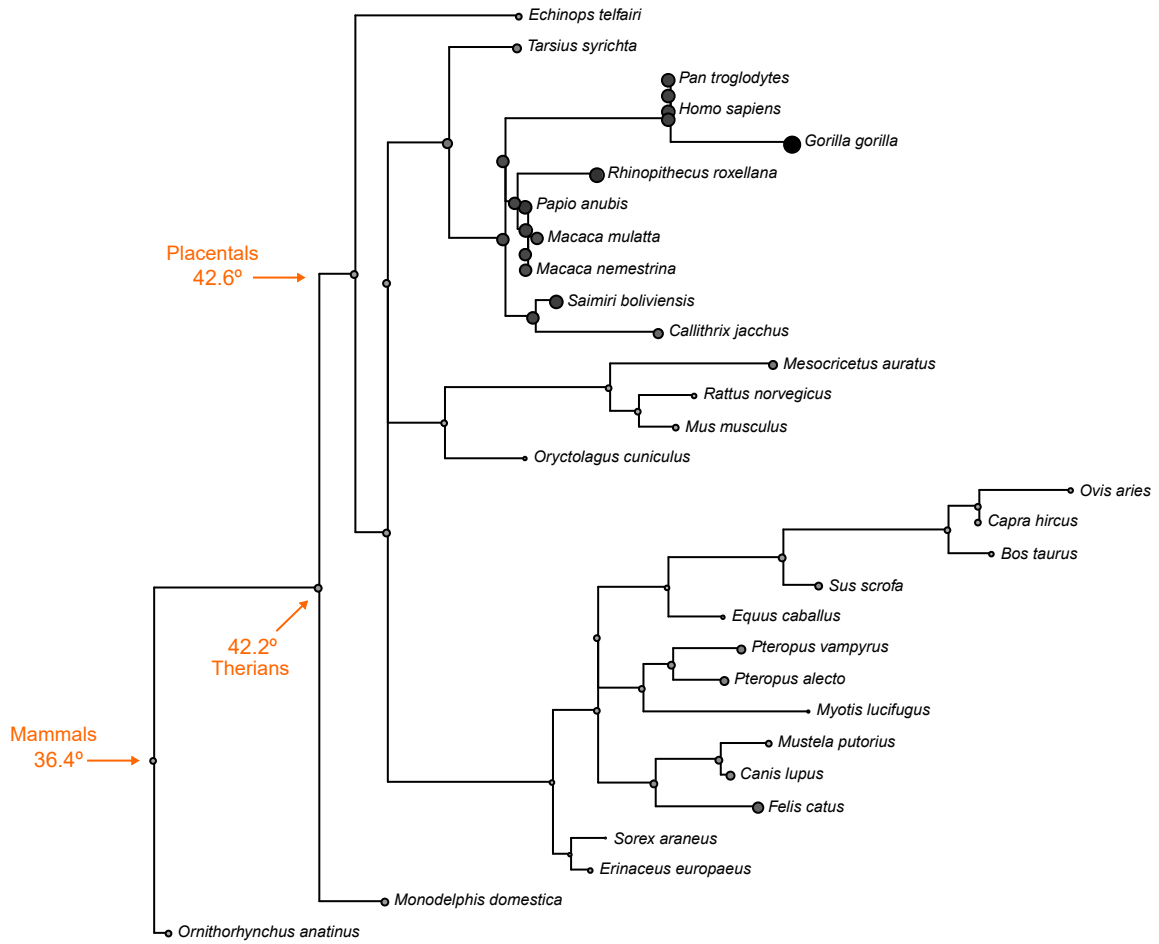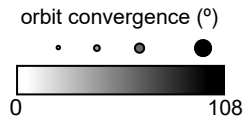

ORBIT CONVERGENCE  
*OPN4m*

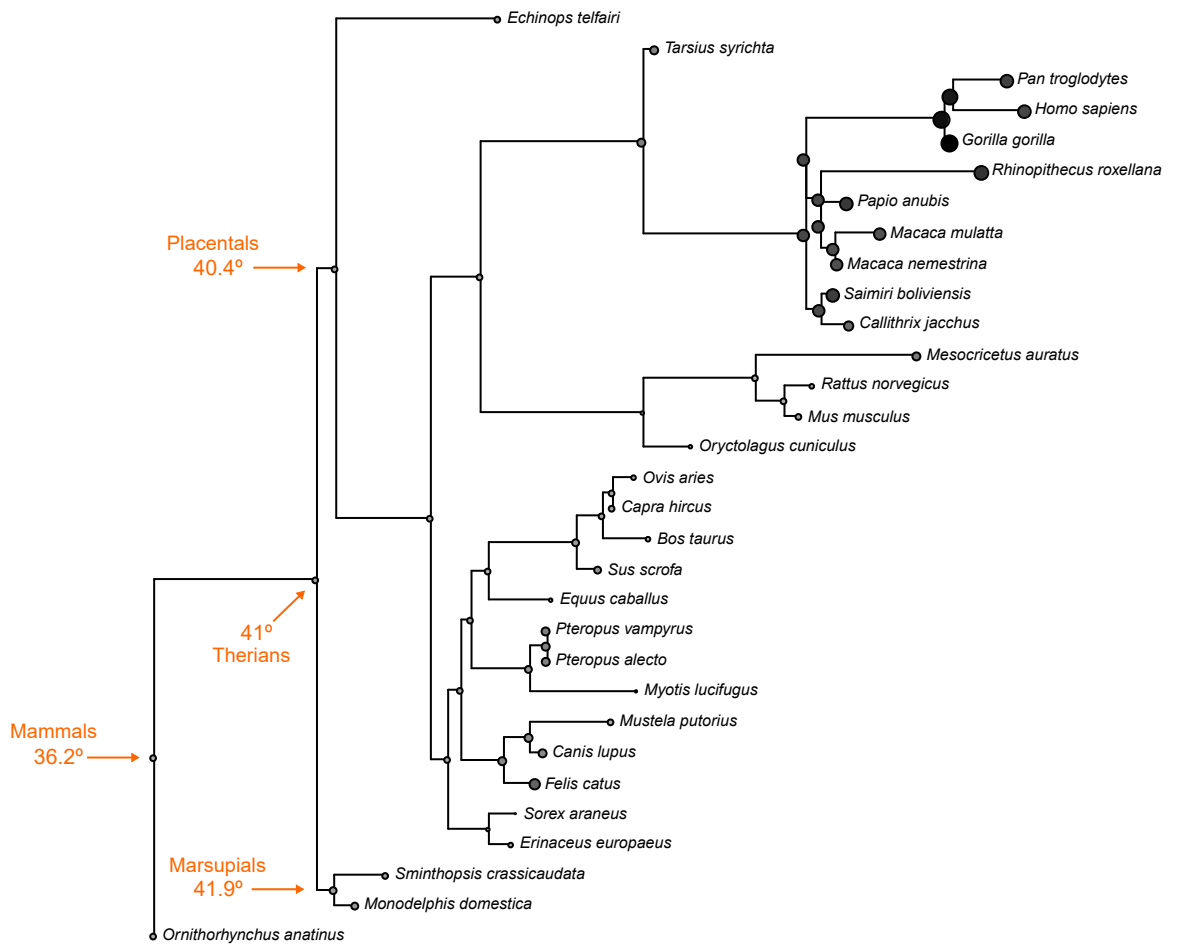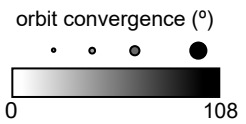

Supplement: 12864_2017_4417_MOESM5_ESM.pdf [file 12864_2017_4417_MOESM5_ESM.pdf]
