# Supplementary material for: Adaptive genomic evolution of opsins reveals that early mammals flourished in nocturnal environments
Source: PubMed Central journal article supplement (PMC5800076; doi:10.1186/s12864-017-4417-8), 2018-02-05
Supplement: 12864_2017_4417_MOESM1_ESM.pdf [file 12864_2017_4417_MOESM1_ESM.pdf]

## Adaptive genomic evolution of opsins reveals that early mammals flourished in nocturnal environments

Rui Borges, Warren E. Johnson, Stephen J. O'Brien, Cidália Gomes, Christopher P. Heesy and Agostinho Antunes

**Table S1**

### Site-selection tests for the mammalian opsins

The logarithm of the model likelihood is represented by lnL, the number of model parameters are represented by np and the LRT is the likelihood ratio test. The accepted site-selection model are indicated with an asterisk (\*) when the M7 model of negative selection is statistically significant, or with a double asterisk (\*\*) if the M8 model of positive selection is statically significant. All the LRT comparisons were performed assuming a significance level of 0.05.

| Gene           | lnL M7     | np  | lnL M8     | np  | LRT 7-8 | p-value | lnL M8a    | np  | LRT 8a-8 | p-value | $\omega$ |    |
|----------------|------------|-----|------------|-----|---------|---------|------------|-----|----------|---------|----------|----|
| <i>RHI</i>     | -18060.196 | 251 | -18060.200 | 253 | 0.000   | 1.000   | -18056.699 | 252 | 0.000    | 1.000   | 0.064    | *  |
| <i>OPN1sw1</i> | -17626.205 | 199 | -17605.265 | 201 | 41.971  | 0.000   | -17607.898 | 200 | 5.266    | 0.022   | 0.178    | ** |
| <i>OPN1lw</i>  | -20776.122 | 253 | -20769.910 | 255 | 12.424  | 0.002   | -20766.851 | 254 | 0.000    | 1.000   | 0.135    |    |
| <i>OPN3</i>    | -14209.085 | 127 | -14171.960 | 129 | 74.251  | 0.000   | -14185.161 | 128 | 26.402   | 0.000   | 0.31     | ** |
| <i>RGR</i>     | -15640.311 | 155 | -15634.514 | 157 | 11.596  | 0.003   | -15633.702 | 156 | 0.000    | 1.000   | 0.193    |    |
| <i>RRH</i>     | -16299.456 | 165 | -16286.261 | 167 | 26.391  | 0.000   | -16295.62  | 166 | 18.717   | 0.000   | 0.273    | ** |
| <i>OPN5</i>    | -11367.748 | 163 | -11360.527 | 165 | 14.441  | 0.001   | -11361.359 | 164 | 1.664    | 0.197   | 0.089    |    |
| <i>OPN4m</i>   | -26002.747 | 169 | -25972.711 | 171 | 60.072  | 0.000   | -25981.877 | 170 | 18.333   | 0.000   | 0.239    | ** |
