# Supplementary material for: Adaptive genomic evolution of opsins reveals that early mammals flourished in nocturnal environments
Source: PubMed Central journal article supplement (PMC5800076; doi:10.1186/s12864-017-4417-8), 2018-02-05
Supplement: 12864_2017_4417_MOESM4_ESM.pdf [file 12864_2017_4417_MOESM4_ESM.pdf]

## Adaptive genomic evolution of opsins reveals that early mammals flourished in nocturnal environments

Rui Borges, Warren E. Johnson, Stephen J. O'Brien, Cidália Gomes, Christopher P. Heesy and Agostinho Antunes

**Table S3**

### Species-specific branch selection tests

The one-ratio model (H0) was tested against the two-ratios model considering the alternative hypotheses (H1) of verifying differentiated  $\omega$ -ratio in the indicated branch. lnL is the logarithm of the model likelihood and the LRT is the likelihood ratio test. All the LRT comparisons were performed with 1 degree of freedom. Significant alternative hypothesis are marked with an asterisk (\*) considering a Bonferroni corrected p-value of 0.002 (24 test comparisons).

| Opsin   | lnL M0     | $\omega$ 0 | Branch                                                      | lnL M1     | $\omega$ 1 | LRT    | p-value |
|---------|------------|------------|-------------------------------------------------------------|------------|------------|--------|---------|
| RH1     | -18807.123 | 0.042      | <i>Hydrurga leptonyx</i> and <i>Leptonychotes weddellii</i> | -18803.085 | 0.687      | 8.076  | 0.005   |
|         |            |            | <i>Erignathus barbatus</i>                                  | -18801.966 | 0.856      | 10.312 | 0.001 * |
|         |            |            | <i>Eubalaena glacialis</i>                                  | -18802.685 | 0.720      | 8.876  | 0.003   |
|         |            |            | <i>Mesoplodon bidens</i>                                    | -18792.297 | 0.778      | 29.651 | 0.000 * |
|         |            |            | Monotremata                                                 | -18806.985 | 0.000      | 0.276  | 0.599   |
|         |            |            | <i>Phoca groenlandica</i>                                   | -18803.648 | 0.414      | 6.949  | 0.008   |
|         |            |            | Verpertilionoidea                                           | -18807.123 | 2.160      | 0.000  | 1.000   |
| OPN1sw1 | -18224.597 | 0.14       | <i>Homo sapiens</i>                                         | -18223.865 | 0.000      | 1.464  | 0.226   |
|         |            |            | <i>Myotis brandtii</i> and <i>Myotis velifer</i>            | -18224.597 | 33.170     | 0.001  | 0.978   |
| OPN1lw  | -21567.983 | 0.108      | <i>Chlorocebus sabaesus</i>                                 | -21565.032 | 0.000      | 5.902  | 0.015   |
|         |            |            | <i>Orcinus orca</i>                                         | -21567.63  | 0.000      | 0.707  | 0.401   |
| OPN3    | -14446.046 | 0.263      | <i>Camelus</i>                                              | -14444.441 | 999.999    | 3.211  | 0.073   |
|         |            |            | <i>Macaca sp.</i>                                           | -14446.046 | 0.084      | 0.000  | 1.000   |
|         |            |            | Cercopithecinae                                             | -14446.046 | 0.093      | 0.000  | 1.000   |
| OPN5    |            |            | Marsupials                                                  | -11603.606 | 0.103      | 0.393  | 0.531   |
|         |            |            | <i>Myotis davidii</i>                                       | -11603.311 | 0.201      | 0.984  | 0.321   |
|         |            |            | <i>Pan sp.</i>                                              | -11603.192 | 0.417      | 1.222  | 0.269   |
|         |            |            | <i>Physeter catodon</i>                                     | -11600.687 | 0.639      | 6.232  | 0.013   |
|         |            |            | <i>Ornitorhynchus anatinus</i>                              | -11600.995 | 0.000      | 5.616  | 0.018   |
| RGR     | -16107.05  | 0.161      | <i>Macaca sp.</i>                                           | -16105.609 | 0.000      | 2.882  | 0.090   |
|         |            | 0.161      | <i>Ornitorhynchus anatinus</i>                              | -16105.468 | 0.000      | 3.166  | 0.075   |
| RRH     | -17046.677 | 0.237      | <i>Ornitorhynchus anatinus</i>                              | -17040.753 | 0.094      | 11.849 | 0.001 * |
|         |            |            | Hominidae                                                   | -17046.677 | 46.617     | 0.000  | 0.983   |
| OPN4m   | -27303.281 | 0.166      | <i>Ornitorhynchus anatinus</i>                              | -27293.688 | 0.000      | 19.186 | 0.000 * |
