# Supplementary material for: Adaptive genomic evolution of opsins reveals that early mammals flourished in nocturnal environments
Source: PubMed Central journal article supplement (PMC5800076; doi:10.1186/s12864-017-4417-8), 2018-02-05

## Adaptive genomic evolution of opsins reveals that early mammals flourished in nocturnal environments

Rui Borges, Warren E. Johnson, Stephen J. O'Brien, Cidália Gomes, Christopher P. Heesy and Agostinho Antunes

### Figure S3

#### Orbit convergence vs. activity patterns in mammals

Box plots depicting the association between the orbit convergence (degrees, °) and the activity pattern (nocturnal and diurnal) of extant mammals.

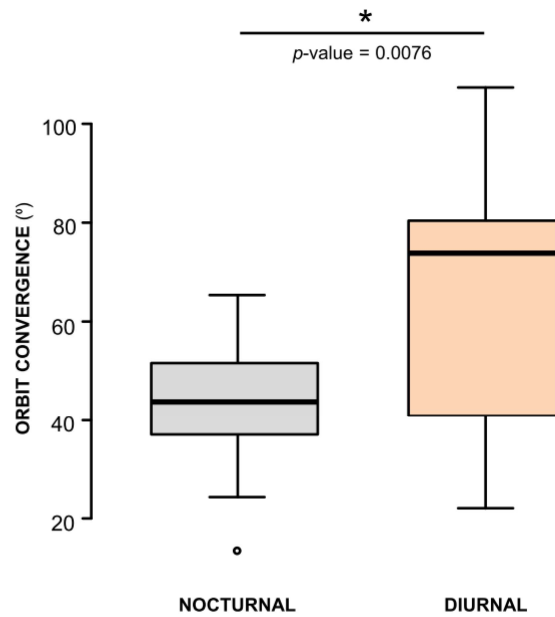

Supplement: 12864_2017_4417_MOESM7_ESM.pdf [file 12864_2017_4417_MOESM7_ESM.pdf]
