# Supplementary material for: Adaptive genomic evolution of opsins reveals that early mammals flourished in nocturnal environments
Source: PubMed Central journal article supplement (PMC5800076; doi:10.1186/s12864-017-4417-8), 2018-02-05
Supplement: 12864_2017_4417_MOESM9_ESM.pdf [file 12864_2017_4417_MOESM9_ESM.pdf]

## Adaptive genomic evolution of opsins reveals that early mammals flourished in nocturnal environments

Rui Borges, Warren E. Johnson, Stephen J. O'Brien, Cidália Gomes, Christopher P. Heesy and Agostinho Antunes

Table S6

### Saturation analysis

The presence of saturation in base substitution for each of the opsin gene alignment was tested by comparing half of the expected theoretical saturation index when assuming full saturation (Iss.c, critical value) with the observed saturation index (Iss). Absence of substitution saturation is verified when Iss is lower than Iss.c for a significant p-value.

| <b>Opsin</b>   | <b>Iss</b> | <b>Iss.c</b> | <b>t</b> | <b>df</b> | <b>p-value</b> |
|----------------|------------|--------------|----------|-----------|----------------|
| <i>RH1</i>     | 0.284      | 0.751        | 36.203   | 1043      | 0              |
| <i>OPN1sw1</i> | 0.307      | 0.751        | 34.954   | 1043      | 0              |
| <i>OPN1lw</i>  | 0.34       | 0.754        | 27.853   | 1088      | 0              |
| <i>OPN4m</i>   | 0.28       | 0.77         | 38.115   | 1391      | 0              |
| <i>OPN3</i>    | 0.392      | 0.761        | 24.914   | 1202      | 0              |
| <i>RGR</i>     | 0.236      | 0.738        | 33.464   | 872       | 0              |
| <i>RRH</i>     | 0.276      | 0.749        | 40.882   | 1010      | 0              |
| <i>OPN5</i>    | 0.189      | 0.752        | 52.204   | 1055      | 0              |
